# Supplementary material for: Intra- and interannual changes in isoprene emission from central Amazonia
Source: Copernicus journal article supplement (doi:10.5194/acp-23-8149-2023), 2023-07-21
Supplement: Supplementary file 1 [file acp-23-8149-2023-supplement.pdf]

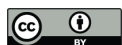

*Supplement of*

## **Intra- and interannual changes in isoprene emission from central Amazonia**

**Eliane Gomes Alves et al.**

*Correspondence to:* Eliane Gomes Alves (egomes@bgc-jena.mpg.de)

The copyright of individual parts of the supplement might differ from the article licence.

## Leaf demography and phenology - phenotype description

A complete description about the installation of the Phenocam on the tower, data collection, image selection and crown selection are given in Lopes et al. (2016) and Gonçalves et al. (2020). The camera monitors 194 upper canopy trees that are free of vines, and evident and massive flush events were observed for 69% of the 194, representing 134 trees. The definition of phenotypes of the 134 trees is:

1. Evergreen: tree crowns that remain green but have detectable flushes, with at least four over the sampling period (2013-2018).
2. Semi-evergreen: similar to evergreen, but flushing maximum three times over the entire sampling period (2013-2018).
3. Brevideciduous: tree crowns that have a brief abscised stage (bare) followed by flushing, approximately every year (2013-2018).
4. semi-brevideciduous: tree crowns that have a brief abscised stage (bare) followed by flushing, but the difference with brevideciduous is that the flushing-abscission dynamics is irregular.

The left 60 tree individuals did not present evident and massive flush events, and therefore it is assumed that they flush new leaves continuously across the year (Lopes et al., 2016).

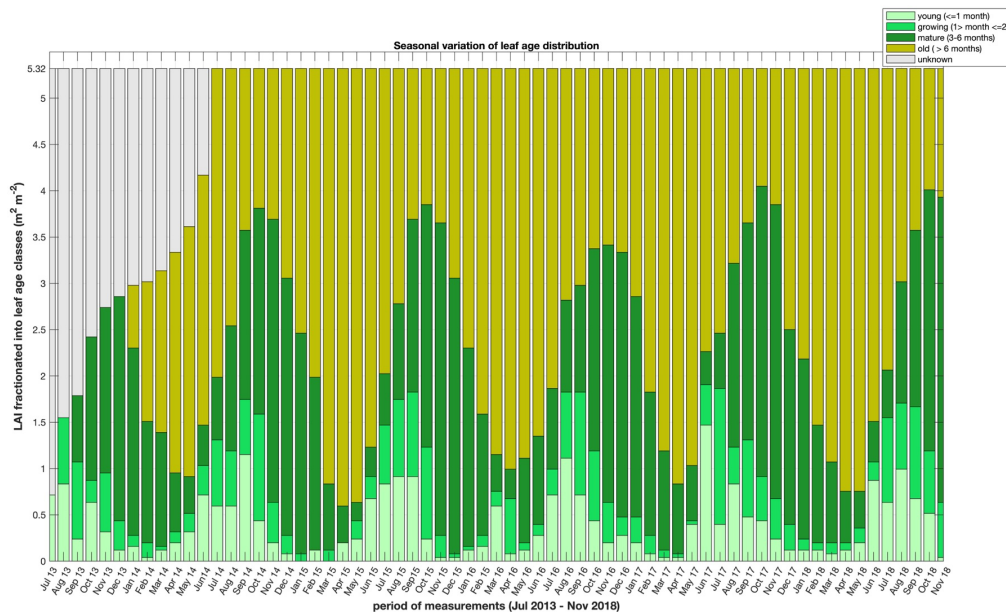

**Figure S1.** LAI fractionated into leaf age classes from July 2013 to November 2018.

## In-canopy micrometeorology and eddy covariance flux uncertainties

To assess the within-canopy air mixing, we analyzed the 2022 datasets of all months we have field campaigns in the past (Feb, Mar, Aug, Sep, Oct, and Nov). Figure S2 shows the Bowen ratio (bottom panel), latent heat flux (middle panel), and sensible heat flux (top panel) measured at 24 m.

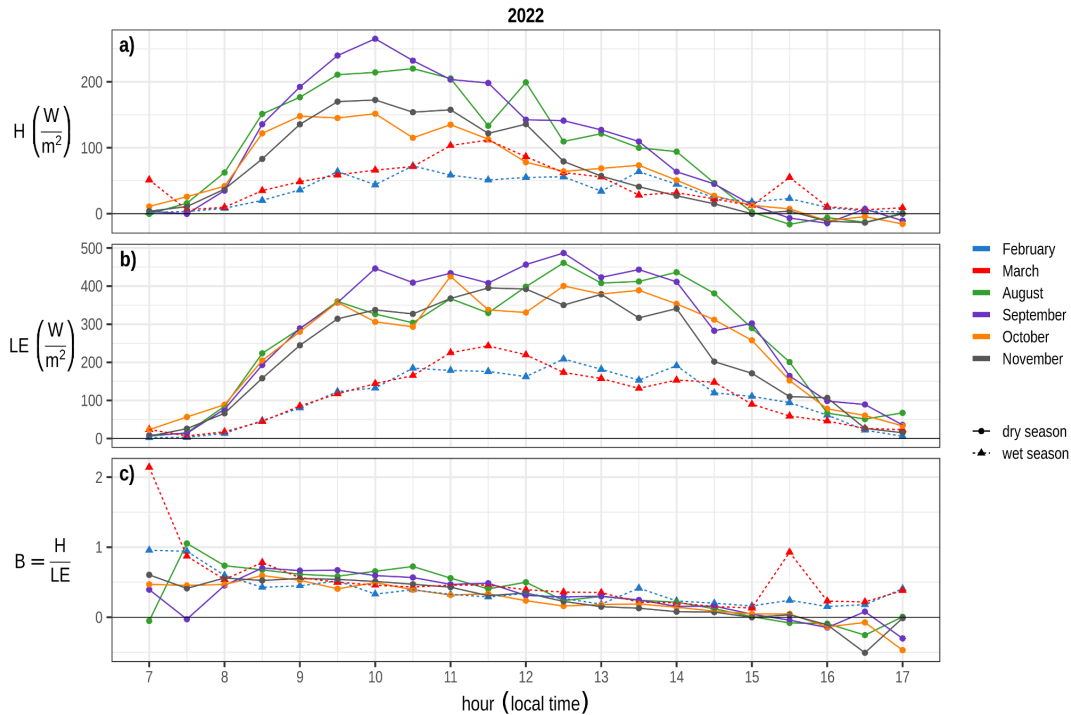

**Figure S2:** Diurnal cycle (07:00-17:00h, local time) of sensible (a) and latent heat (b) fluxes in  $Wm^{-2}$  using data averaged every 30 mins processed with EddyPro Software, and the Bowen ratio calculated for this period (c). Colored lines represent their respective month in 2022, and the dry season is represented by a solid line with points, whereas the dashed lines with triangles refer to the wet season.

We observed that both sensible and latent heat fluxes increased in the dry season, resulting in a very similar Bowen ratio between seasons, especially for the daytime period in which we analyzed isoprene mixing ratios (12:00-15:00, local time). We also considered another parameter that infers the in-canopy stability. For that, we analyzed the canopy profiles of the potential temperature of all months that we had campaigns in 2013, 2014, and 2015 and normalized them to the temperature measured at the top canopy (36 m), accounting for the daytime period that we analyzed isoprene mixing ratios (12:00-15:00, local time) (Figure S3).

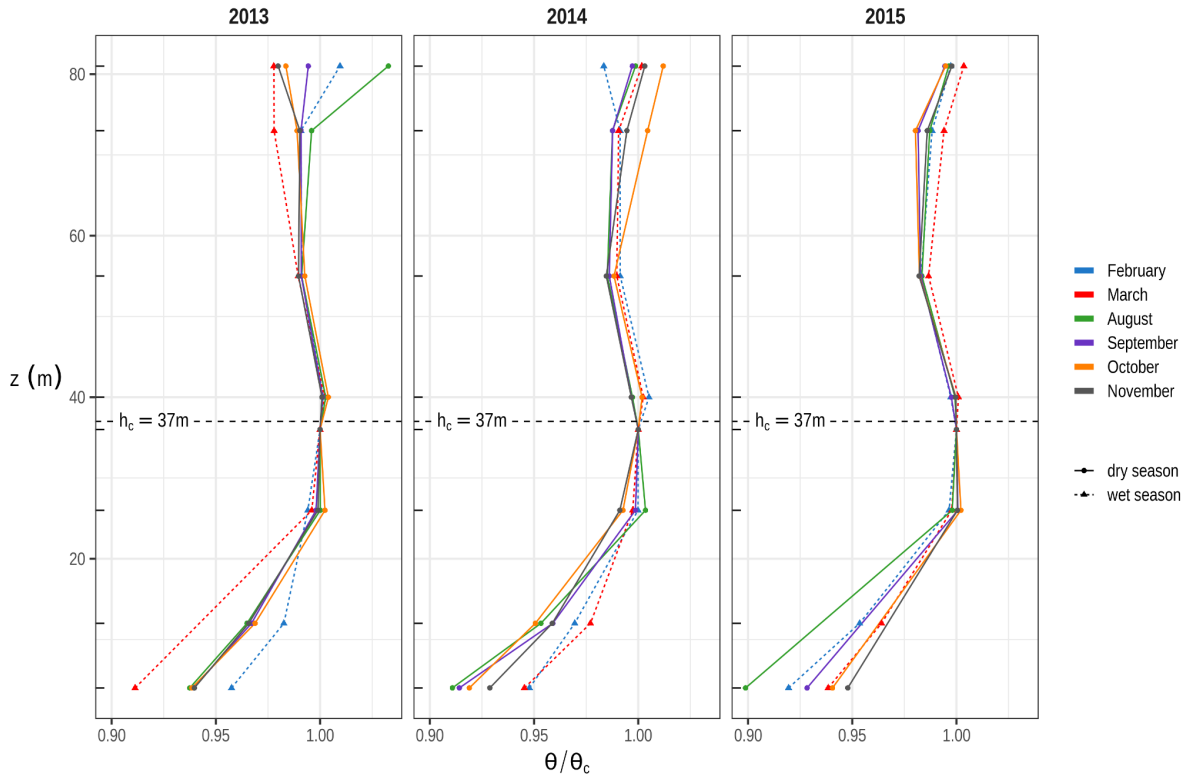

**Figure S3:** Mean vertical profiles of the potential temperature ( $\theta$ ) in  $^{\circ}\text{C}$  (12:00-15:00 local time), normalized to the potential temperature ( $\theta_c$ ) measured at the mean canopy height (36 m). The heights represented are 4, 12, 26, 36, 40, 55, 73, and 81m.

We observed that for all seasons across the years, the atmosphere was stable below 24m, neutral between 24 and 40 m, and unstable above 40 m. These in-canopy stability profiles and Bowen ratio values suggest that, although air mixing might affect isoprene mixing ratio profiles, the higher isoprene concentrations in specific heights (e.g., 24 m in Nov 2012) result from higher emissions; similarly, the lower isoprene concentrations in the same specific heights, but different seasons, result from lower emissions.

Regarding the uncertainties of eddy covariance measurements, we calculated systematic and random uncertainties for the isoprene (m69) fluxes. Systematic errors lead to the failure to capture all of the largest transporting scales, typically leading to an underestimation of the flux. The random error is due to inadequate sampling of the main transporting eddies because of using too short a record length (Vickers et al., 2009). We used the method described by Finkelstein and Sims (2001) to estimate the random flux uncertainty. The integral turbulence scale (ITS) was defined as the cross-correlation first crossing  $1/e$  with a maximum correlation period of 10 s. Mean daytime uncertainties of eddy covariance isoprene flux were at most 15%.

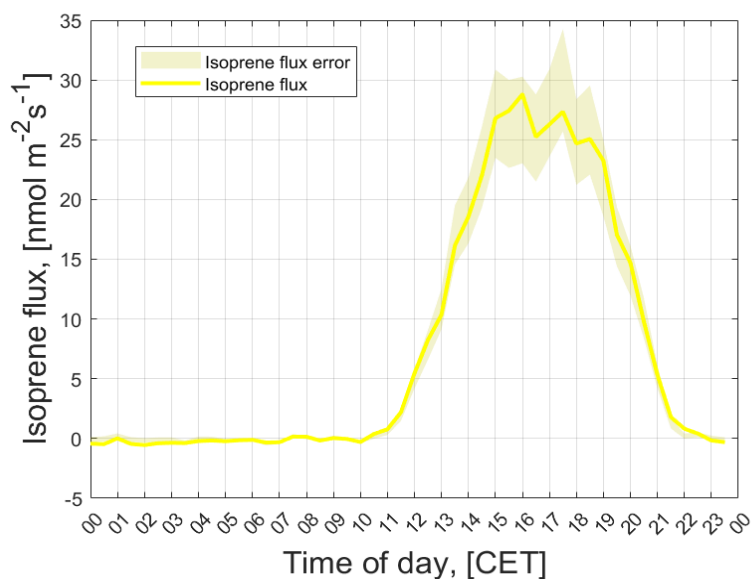

**Figure S4.** Mean diel variation of isoprene flux and the flux error during the period of investigation.

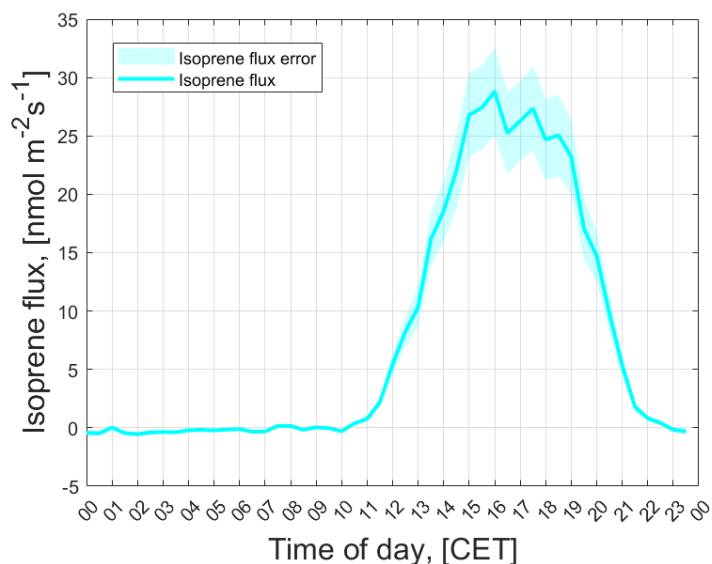

**Figure S5.** Median diel variation of isoprene flux and the flux error during the period of investigation.

The main sources of systematic uncertainties were sonic anemometer tilt, spatial separation between the sonic anemometer and the inlet tube, lag time between the vertical wind speed component  $w$  and the isoprene concentration due to transport time of the air sample through a long tube from the tower to the PTRMS on the ground. We corrected for these sources of uncertainty by applying the standard methods of correction (coordinate rotation, spectral correction in the high and low frequency range, and time lag correction respectively) using the eddy covariance software package Eddypro (LI-COR Biosciences, Lincoln, USA).

More details about these procedures and the data quality control can be found in Pfannerstill et al. (2018) and Pfannerstill et al. (2022).

## Tables

**Table S1:** Isoprene emission capacity across species and leaf ages (days after flushing). Values within brackets represent one standard deviation of mean.

| tree species                       | Isoprene<br>(mg m <sup>-2</sup> h <sup>-1</sup> ) | leaf age<br>(days) | leaf age<br>class* | emitter<br>category | height<br>(m) | date of<br>measurements |
|------------------------------------|---------------------------------------------------|--------------------|--------------------|---------------------|---------------|-------------------------|
| <i>Eschweilera amazonica</i>       | 2.79                                              | 61                 | mature             | medium              | 23            | Nov 3, 2017             |
| <i>Eschweilera bracteosa</i>       | 2.35                                              | 59                 | growing            | medium              | 24            | Nov 1, 2017             |
| <i>Stryphnodendron racemiferum</i> | 3.52                                              | 123                | mature             | medium              | 24            | Nov 3, 2017             |
| <i>Stryphnodendron racemiferum</i> | 3.30                                              | 425                | old                | medium              | 24            | Nov 2, 2017             |
| <i>Protium apiculatum</i>          | 2.26                                              | 121                | mature             | medium              | 24            | Nov 1, 2017             |
| <i>Protium apiculatum</i>          | 1.19                                              | 486                | old                | medium              | 24            | Nov 1, 2017             |
| <i>Protium guianense</i>           | 2.05                                              | 112                | mature             | medium              | 21            | Oct 22, 2017            |
| <i>Protium guianense</i>           | 0.83                                              | 414                | old                | medium              | 24            | Oct 23, 2017            |
| <i>Sacoglottis cf. guianensis</i>  | 1.48                                              | 112                | mature             | medium              | 24            | Oct 23, 2017            |
| <i>Sacoglottis cf. guianensis</i>  | 2.02                                              | 446                | old                | medium              | 24            | Oct 23, 2017            |
| <i>Gustavia elliptica</i>          | 0.56                                              | 116                | mature             | low                 | 22            | Oct 27, 2017            |
| <i>Gustavia elliptica</i>          | 0.60                                              | 295                | old                | low                 | 22            | Oct 27, 2017            |
| <i>Helicostylis tomentosa</i>      | not detected                                      | 20                 | young              | low                 | 26            | Oct 27, 2017            |
| <i>Helicostylis tomentosa</i>      | 0.49                                              | 143                | mature             | low                 | 26            | Oct 24, 2017            |
| <i>Eugenia cuspidifolia</i>        | 0.45                                              | 107                | mature             | low                 | 26            | Oct 18, 2017            |
| <i>Eugenia cuspidifolia</i>        | 0.08                                              | 409                | old                | low                 | 26            | Oct 18, 2017            |
| <i>Eschweilera cyathiformis</i>    | 0.30                                              | 122                | mature             | low                 | 30            | Nov 2, 2017             |
| <i>Eschweilera cyathiformis</i>    | 0.03                                              | 578                | old                | low                 | 30            | Nov 2, 2017             |
| <i>Symphonia globulifera</i>       | 0.13                                              | 138                | mature             | low                 | 26            | Oct 19, 2017            |
| <i>Symphonia globulifera</i>       | 0.08                                              | 258                | old                | low                 | 26            | Oct 19, 2017            |
| <i>morphotype 1</i>                | 0.12                                              | 79                 | mature             | low                 | 30            | Oct 21, 2017            |
| <i>morphotype 1</i>                | 0.07                                              | 475                | old                | low                 | 30            | Oct 21, 2017            |
|                                    |                                                   |                    | old                | not<br>detected     |               |                         |
| <i>Pouteria fimbriata</i>          | not detected                                      | 301                |                    | detected            | 26            | Nov 2, 2017             |
|                                    |                                                   |                    | old                | not<br>detected     |               |                         |
| <i>Mouriri cf. brevipes</i>        | not detected                                      | 414                |                    | detected            | 26            | Oct 23, 2017            |
|                                    | not detected                                      |                    | mature             | not<br>detected     |               |                         |
| <i>Chimarrhis turbinata</i>        |                                                   | 110                |                    | detected            | 26            | Oct 21, 2017            |

|                                   |              |     |        |              |    |              |
|-----------------------------------|--------------|-----|--------|--------------|----|--------------|
| <i>Chimarrhis turbinata</i>       | not detected | 475 | old    | not detected | 26 | Oct 21, 2017 |
| <i>Mouriri cf. dimorphandra</i>   | not detected | 15  | young  | not detected | 32 | Oct 19, 2017 |
| <i>Mouriri cf. dimorphandra</i>   | not detected | 108 | mature | not detected | 32 | Oct 19, 2017 |
| <i>Mouriri cf. dimorphandra</i>   | not detected | 503 | old    | not detected | 32 | Oct 19, 2017 |
| <i>Mouriri cf. duckeana</i>       | not detected | 82  | mature | not detected | 24 | Oct 24, 2017 |
| <i>Mouriri cf. duckeana</i>       | not detected | 415 | old    | not detected | 24 | Oct 24, 2017 |
| <i>Apeiba glabra</i>              | not detected | 17  | young  | not detected | 26 | Oct 21, 2017 |
| <i>Aspidosperma sandwithianum</i> | not detected | 123 | mature | not detected | 23 | Nov 3, 2017  |
| <i>Geissospermum argenteum</i>    | not detected | 23  | young  | not detected | 22 | Oct 27, 2017 |
| <i>Geissospermum argenteum</i>    | not detected | 358 | old    | not detected | 22 | Oct 27, 2017 |
| <i>Hymenaea courbaril</i> ***     | 0.06         | 0   | young  | high         |    | Sep 24, 1999 |
| <i>Hymenaea courbaril</i> ***     | 0.54         | 10  | young  | high         |    | Oct 04, 1999 |
| <i>Hymenaea courbaril</i> ***     | 0.68         | 11  | young  | high         |    | Oct 05, 1999 |
| <i>Hymenaea courbaril</i> ***     | 2.06         | 13  | young  | high         |    | Oct 07, 1999 |
| <i>Hymenaea courbaril</i> ***     | 11.17        | 28  | young  | high         |    | Oct 22, 1999 |
| <i>Hymenaea courbaril</i> ***     | 9.12         | 29  | young  | high         |    | Oct 23, 1999 |
| <i>Hymenaea courbaril</i> ***     | 5.60         | 226 | old    | high         |    | May 08, 1999 |
| <i>Hymenaea courbaril</i> ***     | 6.71         | 227 | old    | high         |    | May 09, 1999 |

\* leaf age classes: young leaves (0–1 month), growing (1–2 months), mature leaves (3–6 months), and old leaves (>6 months)

\*\* Fauset et al. (2015)

\*\*\*Measurements from the Southwestern Amazonia (Kuhn et al., 2004b)



Table S2: Tree species monitored with the phenocam installed on the INSTANT tower and the isoprene emission trait.

File: .xlsx

Table S3: Isoprene emission trait source. The isoprene emission trait was attributed according to literature, new measurements and imputed as in Taylor et al. (2018, 2019).

File: .xlsx
